# Proteases and the Diabetic Foot Syndrome: Mechanisms and Therapeutic Implications

RALF LOBMANN, MD<sup>1</sup>  
GREGORY SCHULTZ, PHD<sup>2</sup>  
HENDRIK LEHNERT, MD<sup>1</sup>

The diabetic foot syndrome represents a major problem in the health care of diabetic patients. Understanding the molecular basis of this disease is an important step toward a rational treatment. Due to the systemic character of diabetes, disturbances in several basic cell functions appear to contribute to impaired wound healing. Many essential processes of normal wound healing are regulated in large part by growth factors and proteases, and changes of their expression and activity are relevant for the pathogenesis of the chronic wound. This review summarizes the current status of research on diabetic foot syndrome and describes new implications for the treatment of this syndrome.

The diabetic foot syndrome is clearly one of the most important complications of diabetes. It not only occurs as a typical complication in the late stages of diabetes but also in patients with newly diagnosed diabetes (1). Despite the postulations of the St. Vincent Declaration that within 5 years the amputation rate has to be reduced by 50%, there are ~30,000 amputations reported each year in Germany due to the diabetic foot syndrome (2–6). Greater success in reducing the diabetic foot syndrome can be achieved using structured diagnosis, classification, and therapy of diabetes (7–12). For example, chronically elevated blood glucose levels

result in reduced leukocyte function and cell malnutrition, which contribute to a high rate of wound infection and associated healing problems (13,14). Due to the systemic effects of diabetes, not only do cellular abnormalities exist but interactions of growth factors and other mediators of wound healing are also impaired (15,16). Thus, understanding the cellular and molecular abnormalities that contribute to the diabetic foot syndrome will enable the rational development of treatments that will reduce the incidence and severity of this major complication of diabetes.

## BIOLOGY OF NORMAL WOUND HEALING

— The physiological cellular response to tissue injury in the skin progresses through a sequence of phases that is structured with regard to both time and space and normally results in a nearly complete recovery of the anatomic and functional integrity of the injured area (Fig. 1). The phases of wound healing—hemostasis, inflammation (acute phase), proliferation (granulation and epithelization), and remodeling—partly overlap and are coordinated in large part by cytokines and growth factors (17–20).

In practical terms, wounds can be described as either acute or chronic with respect to healing. In chronic wounds, the

duration of the wound healing processes is either much slower or actually static, which results in anatomic and functional restrictions (21). In general, wound healing depends on several factors, including the patient's age and physical condition, the location of the wound, the cause of the injury, and accompanying diseases such as diabetes or renal insufficiency, which all have a negative effect on wound healing processes.

The complex and structured dynamics of wound healing involve several populations of cells (thrombocytes or platelets, neutrophil granulocytes, macrophages, fibroblasts, and keratinocytes), soluble factors (cytokines and growth factors), and proteases (e.g., matrix metalloproteinases [MMPs], plasmin, and elastase). The initial phase of healing is hemostasis, which is initiated by the activation of the clotting cascade. The resulting fibrin clot entraps erythrocytes and platelets and blocks blood flow. The fibrin clot forms the provisional wound matrix, and numerous growth factors that are released from the platelets granules chemotactically attract neutrophils, fibroblasts, endothelial cells, and keratinocytes into the wound. These growth factors include platelet-derived growth factor (PDGF), platelet-derived angiogenic factor (PDAF), transforming growth factor- $\beta$  (TGF- $\beta$ ), and epidermal growth factor (EGF). This initial release of growth factors from platelets is very important in initiating the following phases of wound healing (Table 1) (22).

Within 6 h after tissue injury, the inflammation phase starts. Neutrophil granulocytes are the first cells that appear in wounds. They control the contamination with bacteria and cleanse the wound from cell detritus. After ~48 h, the concentration of neutrophil granulocytes reaches its maximum. Monocytes begin infiltrating the wound site ~24 h after injury, attracted by chemotactic factors including complement factor 5 $\alpha$ , degradation products of fibrin, and TGF- $\beta$ . In response to cytokines in the wound, monocytes differentiate into wound mac-

From the <sup>1</sup>Department of Endocrinology and Metabolism, Magdeburg University Medical School, Magdeburg, Germany; and the <sup>2</sup>Department of Obstetrics/Gynecology, Institute of Wound Research, University of Florida, Gainesville, Florida.

Address correspondence and reprint requests to Dr. Ralf Lobmann, Department of Endocrinology and Metabolism, Magdeburg University Medical School, Leipziger Strasse 44, 39120 Magdeburg, Germany. E-mail: ralf.lobmann@medizin.uni-magdeburg.de.

Received for publication 7 July 2004 and accepted in revised form 1 October 2004.

G.S. has been on an advisory panel and is a board member of Greystone Medical Group.

**Abbreviations:** EGF, epidermal growth factor; IL, interleukin; MMP, matrix metalloproteinase; MT-MMP, membrane-type MMP; PDAF, platelet-derived angiogenic factor; PDGF, platelet-derived growth factor; TGF- $\beta$ , transforming growth factor- $\beta$ ; TIMP, tissue inhibitor of metalloproteinase; TNF- $\alpha$ , tumor necrosis factor- $\alpha$ .

© 2005 by the American Diabetes Association.

rophages, which are necessary for wound repair. Inflammation and proliferation overlap in the process of wound healing. The proliferation phase of healing is primarily characterized by granulation tissue (15). MMPs take part in the structured development of granulation tissue by removing damaged matrix proteins, helping cells migrate into the wound, and developing new blood vessels.

About 2 days after injury, macrophages that emerged from monocytes start to express growth factors. These are the dominant types of cells during the 3rd and 4th day. Macrophages continue to release PDGF, macrophage angiogenesis factor, and TGF- $\beta$ . Together, PDGF, macrophage angiogenesis factor, and angiotensin stimulate the formation of new blood vessels, generating the characteristic granulation tissue in the wound. EGF, keratinocyte growth factor, and PDGF stimulate epidermal cells to migrate, divide, and differentiate (keratinize), covering the granulation tissue with a cellular barrier to desiccation and infection (15,18,23–25).

The remodelling phase begins about the 7th day of wound healing and can continue for 6 months to a year. Early in the remodelling phase, the provisional wound matrix, which consists predomi-

nately of fibrin and fibronectin, is replaced with proteoglycan molecules and collagen molecules (type III, type I) that become cross-linked by enzymatic action, which greatly increases the tensile strength of the scar matrix. In addition, some fibroblasts are stimulated to transform into myofibroblasts that contract the wound matrix. In the final stages of remodelling, the high density of new blood vessels and myofibroblasts in the scar decrease as vascular endothelial cells and fibroblasts undergo programmed cell death (apoptosis), and the hypertrophic epidermal layer becomes thinner. These complex processes are regulated by the integrated actions of growth factors, cytokines, proteases, and extracellular matrix components. At the end of the wound healing process, the wound is completely closed. However, the repaired tissue does not completely regenerate the original tissue structure, and some level of functionality of the scar tissue is usually lost (15,22).

### **PATHOGENESIS OF WOUND HEALING IN CHRONIC WOUNDS**

Results of many studies have identified defects of wound healing in patients with diabetes that can be explained in large part by dys-

functional wound cells and by imbalances in key proteases, cytokines, and growth factors. In contrast to normal wound healing, the inflammatory reaction in poorly healing diabetic wounds appears prolonged, which generates a correspondingly intensified protease response, in particular MMPs and neutrophil elastase (Fig. 2). These inflammatory reactions are possibly the result of bacterial contamination and recurrent painless tissue trauma. Bacterial endotoxins, fragments of extracellular matrix, and cell detritus maintain this inflammation, which is evidenced by the large number of neutrophil granulocytes in the wound. The granulocytes also secrete proinflammatory cytokines, particularly tumor necrosis factor- $\alpha$  (TNF- $\alpha$ ) and interleukin (IL)-1 $\beta$ . Both of these cytokines are capable of directly stimulating the synthesis of MMPs. In addition, TNF- $\alpha$  stimulates its own secretion and that of IL-1 $\beta$ , which can contribute to a persistent inflammatory status (15,18, 26). Thus, normal wound healing requires a balanced interaction of growth factors, cytokines, proteases, and extracellular matrix. In chronic wounds, the high level of proteases in the wound site leads to a disrupted and uncoordinated wound healing process by degrading matrix proteins and growth factors that are

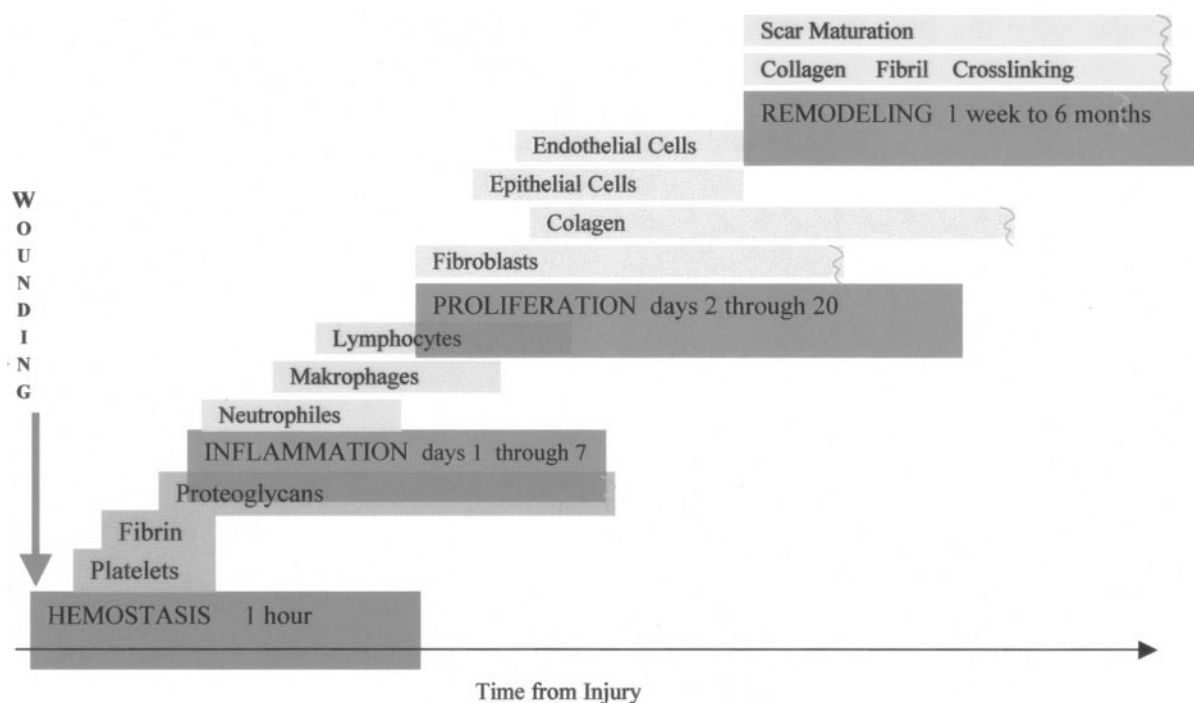

**Figure 1**—Phases of normal wound healing.

Table 1—Major growth factor families

| Growth factor family                                              | Cell source                                                                          | Actions                                                                                                                                                          |
|-------------------------------------------------------------------|--------------------------------------------------------------------------------------|------------------------------------------------------------------------------------------------------------------------------------------------------------------|
| TGF- $\beta$ : TGF- $\beta$ 1, TGF- $\beta$ 2, and TGF- $\beta$ 3 | Platelets<br>Fibroblasts<br>Macrophages                                              | Fibroblast chemotaxis and activation<br>ECM deposition<br>Collagen synthesis<br>TIMP synthesis<br>MMP synthesis<br>Reduces scarring<br>Collagen<br>Fibronectin   |
| PDGF: PDGF-AA, PDGF-BB, and VEGF                                  | Platelets<br>Macrophages<br>Keratinocytes<br>Fibroblasts                             | Activation of immune cells and fibroblasts<br>ECM deposition<br>Collagen synthesis<br>TIMP synthesis<br>MMP synthesis<br>Angiogenesis                            |
| FGF: acidic FGF, basic FGF, and KGF                               | Macrophages<br>Endothelial cells<br>Fibroblasts                                      | Angiogenesis<br>Endothelial cell activation<br>Keratinocyte proliferation and migration<br>ECM deposition                                                        |
| IGF: IGF-I, IGF-II, and insulin                                   | Liver<br>Skeletal muscle<br>Fibroblasts<br>Macrophages<br>Neutrophils                | Keratinocyte proliferation<br>Fibroblast proliferation<br>Endothelial cell activation<br>Angiogenesis<br>Collagen synthesis<br>ECM deposition<br>Cell metabolism |
| EGF: EGF, HB-EGF, TGF- $\alpha$ , amphiregulin, and betacellulin  | Keratinocytes<br>Macrophages<br>Fibroblasts<br>Endothelial cells<br>Epithelial cells | Keratinocyte proliferation and migration<br>ECM deposition<br>Mediates action of TGF- $\beta$ s on collagen synthesis                                            |
| CTGF                                                              |                                                                                      |                                                                                                                                                                  |
| Cytokines involved in wound healing                               | Cell source                                                                          | Biological activity                                                                                                                                              |
| Proinflammatory cytokines                                         |                                                                                      |                                                                                                                                                                  |
| TNF- $\alpha$                                                     | Macrophages                                                                          | PMN margination and cytotoxicity, $\pm$ collagen synthesis, and provides metabolic substrate                                                                     |
| IL-1                                                              | Macrophages                                                                          | Fibroblast and keratinocyte chemotaxis and collagen synthesis                                                                                                    |
| IL-2                                                              | Keratinocytes                                                                        |                                                                                                                                                                  |
| IL-6                                                              | T-cells                                                                              | Increases fibroblast infiltration and metabolism                                                                                                                 |
|                                                                   | Macrophages                                                                          | Fibroblast proliferation and hepatic acute-phase protein synthesis                                                                                               |
| IL-8                                                              | PMNs<br>Fibroblasts<br>Macrophages                                                   | Macrophage and PMN chemotaxis and keratinocyte maturation                                                                                                        |
| $\gamma$ -Interferon                                              | Fibroblasts<br>T-cells                                                               | Macrophage and PMN activation, retards collagen synthesis and cross-linking, and stimulates collagenase activity                                                 |
| Anti-inflammatory cytokines                                       | Macrophages                                                                          |                                                                                                                                                                  |
| IL-4                                                              | T-cells                                                                              | Inhibition of TNF, IL-1, and IL-6 production; fibroblast proliferation; and collagen synthesis                                                                   |
| IL-10                                                             | Basophils<br>Mast cells<br>T-cells                                                   |                                                                                                                                                                  |
|                                                                   | Macrophages<br>Keratinocytes                                                         | Inhibition of TNF, IL-1, and IL-6 production and inhibits macrophage and PMN activation                                                                          |

CTGF, connective tissue growth factor; ECM, extracellular matrix; FGF, fibroblast growth factor; HB-EGF, heparin binding epidermal growth factor; KGF, keratinocyte growth factor; PMN, polymorphonuclear leukocyte; VEGF, vascular endothelial growth factor.

## Molecular environment of wounds

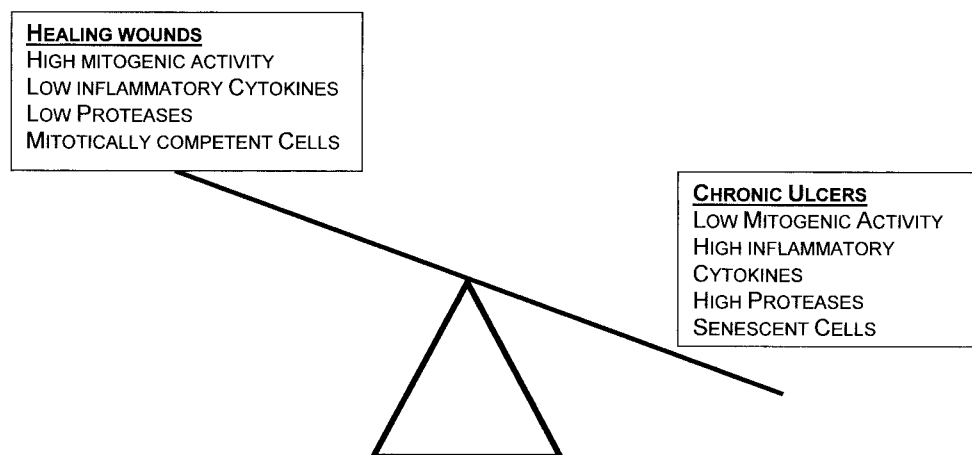

**Figure 2**—Imbalances in the molecular environments of acute healing wounds and chronic nonhealing wounds.

essential for healing (Fig. 3) (26,27). A recent study by Piaggese et al. (28) found that pressure relief of neuropathic ulcers in 10 diabetic patients provided by total-contact casts significantly reduced ulcer size after 20 days of casting compared with patients with comparable lesions and glycemic control but without casts. Furthermore, the histopathological features of the two groups differed markedly. Patients without pressure relief showed a predominance of inflammatory elements as well as matrix alterations, vessel disruptions, inflammation, and debris. Ulcers in patients with total-contact casts showed a shift toward a reparative pattern with prevalence of newly formed capillaries and fibroblasts. These results indicate that pressure relief with a total-contact cast is associated with changes in the histology of neuropathic foot ulcers, indicating reduction of inflammatory and reactive components and acceleration of reparative processes. This supports the hypothesis proposed initially by Mast and Schultz (18) that repeated injury of tissue leads to prolonged inflammation, which causes elevated levels of proteases that degrade molecules that are essential to healing, eventually leading to a failure of the wound to heal.

### CYTOKINES AND GROWTH FACTORS IN WOUND HEALING

— Cytokines and growth factors are small polypeptides that are se-

creted by different cell types and act as molecular signals that control cellular proliferation, differentiation, migration, and metabolism (Tables 1 and 2). They modulate the composition and turnover of various components of the extracellular matrix. In the first phase of wound healing, TNF- $\alpha$ , TGF- $\beta$ , and PDGF appear to be particularly relevant (29,30). Multiple animal studies have reported that addition of exogenous growth factors are able to positively influence wound healing in acute and impaired wounds (29,31–33). Moreover, studies have found reduced concentrations of growth factors (PDGF, basic fibroblast growth factor, EGF, and TGF- $\beta$ ) in chronic wounds compared with acute wounds (34). In addition, Falanga et al. (35) reported that fluids collected from chronic venous ulcers interfered with cell proliferation. Also, Schultz et al. (36) found evidence that drainage fluid after mastectomy stimulated mitosis but exudates from chronic wounds inhibited cell proliferation. The results of these studies suggest that the activities of cytokines and growth factors that are essential for cell proliferation are absent or significantly reduced in chronic wounds.

A number of cytokines, such as IL-1, -2, -6, and -8, are upregulated during the process of acute wound healing (18). IL-1 plays an important role in the early phase of wound healing by recruiting leuko-

cytes into the wound area (37). In skin wounds, IL-1 is predominantly produced by epithelial cells, and exogenously added IL-1 improved wound healing in several animal studies (38–40). Similarly, treatment of skin wounds in animals with IL-2 increased the number of lymphocytes in the wounds and resulted in better collagen production and mechanical consistency of the wounds, which demonstrates the positive influence of T-cells on wound healing (41,42).

In vitro, TGF- $\beta$  stimulates several important functions of fibroblasts, including chemotactic migration, synthesis of extracellular matrix components (fibronectin and collagen), and contraction of matrix. Local application of TGF- $\beta$  enhances collagen production and mechanical tensile strength of wounds in normal rats (43). In addition, injections of TGF- $\beta$  (or basal fibroblast growth factor) into polyvinyl alcohol sponges implanted subcutaneously in normal rats or streptozotocin-induced diabetic rats significantly increased accumulation of granulation tissue and collagen (44).

PDGF is another key growth factor in wound healing. PDGF is secreted by macrophages, endothelial cells, fibroblasts, and megakaryocytes. It stimulates chemotactic migration of fibroblasts, smooth muscle cells and inflammatory cells, stimulates proliferation, and increases synthesis of collagen by fibroblasts (45,46).

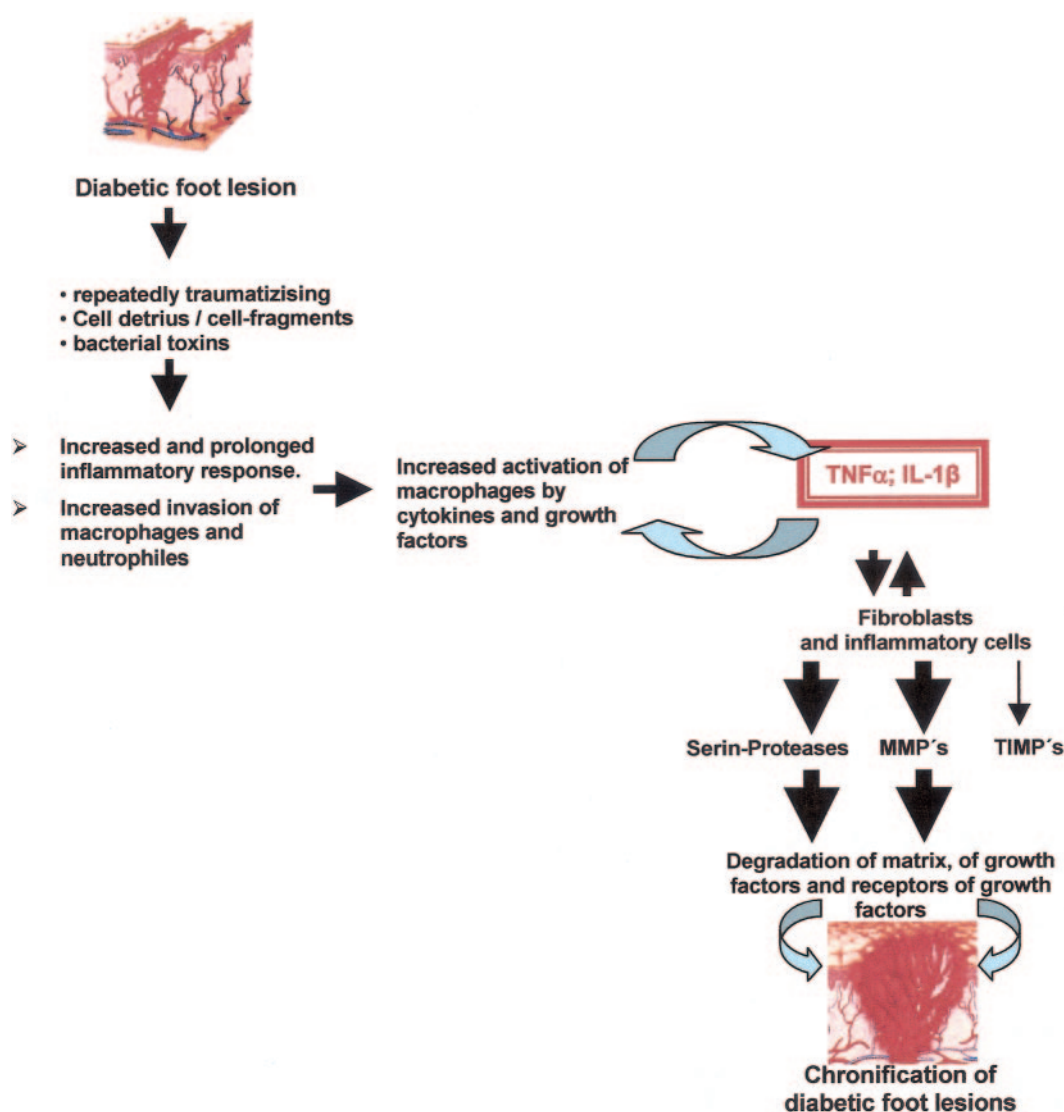

**Figure 3**—Model of the molecular pathophysiology of chronic wounds.

Local application of PDGF increases collagen production and angiogenesis in acute wounds of rats and normalizes healing processes in diabetic animals (47).

## MMPS IN WOUND HEALING

**HEALING**— MMPs play essential roles in initial wound debridement as well as in the phases of angiogenesis, epithelialization, and remodelling of scar (48–53). The large family of MMPs contains about 20 different enzymes that can be grouped into several distinct subclasses (collagenases, gelatinases, stromelysins, and membrane-type MMPs [MT-MMPs]) based on the structure of the substrates that are cleaved and the structures of the MMPs (Table 3) (24,48,54). MMPs are broadly expressed by inflammatory cells, fibroblasts, endothelial cells, and keratin-

ocytes at different times during wound healing. The control of expression into the wound area and the timed release of different MMPs is directly associated with a successful and well-structured wound healing (48,55). For example, the expression of MMP-1 is typically associated with the migration of keratinocytes (24,56,57). MMP-3 is needed for reconstruction of the new basement membrane. MMP-2 and MMP-9 are needed to remove denatured fibrillar collagen and for the proper development of granulation tissue (55,58,59).

## Synthesis, activation, and inhibition of MMPs

The activity of MMPs is controlled on three levels. First, transcription is highly regulated by several cytokines, especially

EGF, PDGF, IL-1, and TNF- $\alpha$  (60–65). While these factors primarily stimulate the production of MMPs, TGF- $\beta$  is able to reduce the production of MMPs through inhibition of transcription (66–70). Second, MMPs are synthesized as inactive proenzymes that must be activated and released by proteases, including kallikrein, plasmin, or elastase (71). Third, MMP activities are regulated by inhibition by tissue inhibitors of metalloproteases (TIMPs) (48,72).

## Different actions of MMPs

**Collagenases.** MMP-1, -3, -8, and -13 are the only subfamily of MMPs that are capable of rapidly cutting the intact triple helix of fibrillar collagens. Only after the collagenases make a single initial cut of fibrillar collagens can other MMPs, such

Table 2—MMPs and TIMP

| Protein  | Pseudonym                                          | Substrates                                                                                                         |
|----------|----------------------------------------------------|--------------------------------------------------------------------------------------------------------------------|
| MMP-1    | Interstitial collagenase<br>Fibroblast collagenase | Types I, II, III, VII, and X collagens                                                                             |
| MMP-2    | 72-kDa gelatinase<br>Gelatinase A                  | Types IV, V, VII, and X collagens                                                                                  |
| MMP-3    | Type IV collagenase<br>Stromelysin-1               | Types III, IV, IX, and X collagens<br>Types I, III, IV, and V gelatins<br>Fibronectin, laminin and procollagenase  |
| MMP-7    | Matrilysin                                         | Types I, III, IV and V gelatins                                                                                    |
| MMP-8    | Uterine metalloproteinase                          | Casein, fibronectin and procollagenase                                                                             |
| MMP-9    | Neutrophil collagenase                             | Types I, II, and III collagens                                                                                     |
| MMP-9    | 92-kDa gelatinase<br>Gelatinase B                  | Types IV and V collagens<br>Types I and V gelatins                                                                 |
| MMP-10   | Type IV collagenase<br>Stromelysin-2               | Types III, IV, V, IX, and X collagens<br>Types I, III, and IV gelatins<br>Fibronectin, laminin, and procollagenase |
| MMP-11   | Stromelysin-3                                      | Not determined                                                                                                     |
| MMP-12   | Macrophage metalloelastase                         | Soluble and insoluble elastin                                                                                      |
| MT-MMP-1 | Membrane-type MMP-1                                | Pro-MMP-2                                                                                                          |
| MT-MMP-2 | Membrane-type MMP-2                                | Not determined                                                                                                     |
| TIMP-1   | Tissue inhibitor of metalloproteinases-1           | Collagenases                                                                                                       |
| TIMP-2   | Tissue inhibitor of metalloproteinases-2           | Collagenases                                                                                                       |
| TIMP-3   | Tissue inhibitor of metalloproteinases-3           | Collagenases                                                                                                       |

as the gelatinases, further degrade the collagen molecules. MMP-1 secretion by fibroblasts, migrating epidermal cells, and vascular endothelial cells begins to increase during the postacute phase of wound healing since the gene must be transcribed and the mRNA translated into protein (73,74). In contrast, preformed MMP-8 is released rapidly from storage granules of activated neutrophil granulocytes (57,75). MMP-1 and MMP-8 are additionally able to degrade elastin and types VII, VIII, and X collagen (53,74).

**Gelatinases.** MMP-2 (72-kDa gelatinase A) and MMP-9 (92-kDa gelatinase B) preferentially digest partially denatured fibrillar collagens (types I, I, and III) after collagenases make an initial cut that opens their extended triple helix structure (76). The gelatinase are also able to degrade nonfibrillar types of collagens, including IV, V, VII, and X collagen (74). MMP-2 is the most widespread of all MMPs, being expressed in skin fibroblasts, keratinocytes, vascular endothelial cells, and monocytes. MMP-2 is often made constitutively, but it is usually not activated unless conditions surrounding the cells change. In contrast, MMP-9 is not made constitutively, but its synthesis is induced in leukocytes, keratinocytes, monocytes,

and macrophages as well as by various malignantly transformed cells (77).

**Stromelysin.** The Stromelysin subfamily of MMPs contains several members (MMP-3, -7, -10, -11, and -12). Due to their broad substrate specificity, this class of MMPs is especially connected with the degradation of proteoglycans, nonfibrillar collagens, and noncollagen components of basement membranes (collagen type IV, V, IX, and X, elastin, and fibronectin) (78,79). MMP-3 levels generally increase later in wound repair and may coincide with the initiation of wound contraction (73,80).

**MT-MMPs.** MT-MMPs are a unique subgroup of MMPs because they are bound to cell membranes by a hydrophobic segment. So far, four different types of MT-MMPs (MT1–MT4) have been found (24,81). Their functions include proteolytic activation of other pro-MMPs, including pro-MMP-2 and MMP-9 (82,83).

**TIMPs.** TIMP-1 and TIMP-2 bind noncovalently to the active form of MMPs and inhibit their activity. TIMP-1 can bind to all active MMPs but preferentially inhibits MMP-1. TIMP-2 is more effective in inhibiting MMP-2 than TIMP-1 (84,85–89).

## ABNORMAL LEVELS OF MMPs IN CHRONIC WOUNDS

A balance between proteases and their inhibitors is necessary for a correct wound healing, and several studies (90,91) have found elevated levels of proteases and reduced levels of inhibitors in chronic wounds (Fig. 2). Increased levels of MMP-2 and MMP-9 could be demonstrated in various chronic wound liquids (89). Increased levels of MMP-1 and MMP-8 were found in decubital ulcers (26). Similar results were obtained for MMP-13 in venous ulcer lesions (92). At the same time, reduced levels of TIMPs were found in chronic wound fluids (90,93). Ladewig et al. (56) demonstrated the ratio of MMP-9 to TIMP-1 as an important predictor for healing of chronic wounds, demonstrating an inverse correlation with the healing tendency of chronic pressure ulcers. Similar processes can be expected in nonhealing or badly healing diabetic foot lesions; first hints could be found in studies by Loots et al. (94), Dahn et al. (95), and Mansbridge et al. (96).

Our own data show higher concentrations of MMPs (MMP-2, -9, and -8) and reduced concentrations of inhibitors of MMPs (TIMP) in diabetic wounds compared with trauma lesions of a control group with normal glucose metabolism. In contrast to normal wound healing, an overexpression of these proteases seems to support a delayed wound healing and lead to a failure of wounds to heal. Additionally, there is evidence of an imbalance between MMPs and TIMPs that significantly contributes to the pathogenesis of nonhealing chronic lesions (97). First clinical studies (98–102) seem to confirm this concept and the clinical efficacy.

## CLINICAL STUDIES WITH GROWTH FACTORS AND PROTEASE INHIBITORS

### Local therapy with growth factors

Based on results of studies discussed above, which found low concentrations of several key growth factors, reduced mitogenic activity, and elevated levels of proteases in fluids collected from chronic wounds, it was reasonable to theorize that topical treatment of chronic wounds with exogenous growth factors would correct the deficiency of growth factors and promote healing (47). Numerous animal studies (29,31–33) supported the ability

of local application of various growth factors (PDGF, basic fibroblast growth factor, and TGF- $\beta$ 1) to promote healing of normal and impaired wound models. This led to one of the first clinical studies (103), performed almost 20 years ago, that showed a positive effect of locally applied autologous platelet extract on healing of human chronic wounds.

The use of standardized growth factor preparations produced by recombinant DNA technology was an attractive alternative to production of autologous platelet extracts by wound care providers because it bypassed the need for local technology infrastructure necessary to produce autologous platelet extract and the variability of growth factor activity between preparations. There are now multiple clinical studies (104–111) on the diabetic foot syndrome evaluating the use of recombinant PDGF (Regranex) that showed improvements in the probability of healing and reduction of healing time. Smiell et al. (112) reported that the percentage of patients with a fully healed wound after application of rhPDGF was much higher (39%) than of those treated with a placebo ( $P < 0.007$ ). A very important clinical observation that came from the development of Regranex was that the wound bed needed to be properly debrided for the growth factor to have maximum benefit (113). This concept led to the formalization of the concept of wound bed preparation, which emphasizes the removal of barriers to healing and the integration of advanced technologies in wound care (114).

### Local therapy with protease inhibitors

The other common characteristic of chronic wounds, besides reduced growth factor activity, is elevated protease activities. Thus, it is reasonable to theorize that local (or systemic) treatment of chronic wounds with protease inhibitor(s) would promote healing. This led to the simple approach of treating chronic diabetic foot ulcers with doxycycline, which is an antibiotic of the tetracycline family of molecules that has the unusual property of also being a competitive inhibitor of metalloproteases, including the MMPs and the TNF- $\alpha$  converting enzyme. Doxycycline can also reduce inflammation by reducing synthesis of nitric oxide (NO) (101,102, 115). Evaluation of a chemically tetracycline analogue in an animal study (116)

also showed that local therapy reduced levels of MMP-8 and MMP-13 mRNA in dermal wounds of rats. Supporting this concept, an initial report (117) of a randomized controlled trial showed improved healing of chronic diabetic foot ulcers treated with a topical doxycycline gel.

Another approach to reducing protease activity in chronic wounds is to apply dressings that contain high concentrations of gelatin, which is a substrate for MMPs (98–100,118). In a clinical study, Cullen et al. (98) reported that elastase and plasmin activities in wound fluids were significantly reduced by a local therapy with the protease inhibitor dressing, Promogran. Further studies (99,100) reported a trend to more frequent and rapid healing of diabetic foot ulcers and venous ulcers with these protease inhibitors. It is theorized that the Promogran dressing improved healing by reducing the activities of MMPs (and perhaps serine proteases such as elastase) in the molecular environment of the wound. Further data will be needed to substantiate this theory. Another new dressing consisting of metal ions and citric acid (Dermax) was reported (119) to reduce reactive oxygen species and decrease MMP-2 production in vitro.

**SUMMARY** — The long duration of treatment as well as high costs to treat Wagner stage 2–4 of diabetic foot ulcers make it imperative to employ effective programs that prevent wounds from developing and accelerate healing rates once wounds occur (120). Most diabetic ulcerations can be prevented by educating and informing patients (120–127). Once a wound develops, ~70% of neuropathic foot lesions in diabetic patients can achieve healing by structured and stage-related therapy (off loading) and removing the barriers to natural healing by employing the concepts of wound bed preparation (debridement, control of infection/inflammation, proper moisture balance, and care of the epidermal edge) (128–131). When more advanced adjuvant therapies are needed to promote healing, the therapies employed should be based on correcting the molecular defects that have been identified in chronic wounds, such as increasing the levels of biologically active growth factors (106,132–135) and reducing elevated levels of proteases (22,95,98,101,120, 134,136–138). Advanced adjuvant therapies

employing autologous platelet extracts, recombinant growth factors, protease inhibitors, dressings that reduce protease activities, and bioengineered skin substitutes are currently available. Future studies will need to evaluate if combinations of advanced adjuvant therapies are beneficial in especially hard to heal diabetic wounds.

### References

1. New JP, McDowell D, Burns E, Young RJ: Problem of amputations in patients with newly diagnosed diabetes mellitus. *Diabet Med* 15:760–764, 1998
2. Diabetes Care and Research Group in Europe: The Saint Vincent Declaration. *Diabet Med* 7:360, 1990
3. Trautner C, Haastert B, Spraul M, Giani G, Berger M: Unchanged incidence of lower-limb amputations in a German city, 1990–1998. *Diabetes Care* 24:855–859, 2001
4. Trautner C, Haastert B, Giani G, Berger M: Amputations and diabetes: a case-control study. *Diabet Med* 19:35–40, 2002
5. Trautner C, Haastert B, Giani G, Berger M: Incidence of lower limb amputations and diabetes. *Diabetes Care* 19:1006–1009, 1996
6. Standl E: Zur Epidemiologie des diabetischen Fußsyndroms. *Diab & Stoffw* 9:339–342, 2000
7. Hierl FX, Landgraf R: Clinical symptoms and clinical diagnosis in diabetic foot syndrome. *Internist* 40:1002–1008, 1999
8. Landgraf R, Hierl FX: General therapy of patients with diabetic foot syndrome. *Internist* 40:1018–1023, 1999
9. Apelqvist J, Bakker K, van Houtum WH, Nabuurs-Franssen MH, Schaper NC: International consensus and practical guidelines on the management and the prevention of the diabetic foot: International Working Group on the Diabetic Foot. *Diabetes Metab Res Rev* 16 (Suppl. 1):S84–S92, 2000
10. Armstrong DG, Lavery LA: Diabetic foot ulcers: prevention, diagnosis and classification. *Am Fam Physician* 57:1325–1332, 1998
11. Frykberg RG, Armstrong DG: The Diabetic Foot 2001: a summary of the proceedings of the American Diabetes Association's 61st Scientific Symposium. *J Am Podiatr Med Assoc* 92:2–6, 2002
12. Boulton AJ, Meneses P, Ennis WJ: Diabetic foot ulcers: a framework for prevention and care. *Wound Repair Regen* 7:7–16, 1999
13. Edelson GW: Systemic and nutritional considerations in diabetic wound healing. *Clin Podiatr Med Surg* 15:41–48, 1998
14. Spravchikov N, Szyakov G, Gartsbein

- M, Accili D, Tennenbaum T, Wertheimer E: Glucose effects on skin keratinocytes: implications for diabetes skin complications. *Diabetes* 50:1627–1635, 2001
15. Nwomeh BC, Yager DR, Cohen IK: Physiology of the chronic wound. *Clin Plast Surg* 25:341–356, 1998
16. Lerman OZ, Galiano RD, Armour M, Levine JP, Gurtner GC: Cellular dysfunction in the diabetic fibroblast: impairment in migration, vascular endothelial growth factor production, and response to hypoxia. *Am J Pathol* 162:303–312, 2003
17. Hunt TK, Burke J, Barbul A, Gimbel ML: Wound healing (Letter). *Science* 284:1775, 1999
18. Mast BA, Schultz GS: Interactions of cytokines, growth factors and proteases in acute and chronic wounds. *Wound Repair Regen* 4:441–420, 1996
19. Tarnuzzer RW, MacAuley S, Bruce M, Mast BA, Stacey MC, Tengrove N: *Epidermal Growth Factor in Wound Healing: A Model for Molecular Pathogenesis of Chronic Wounds*. Ziegler TR, Ed. Norwell, MA, Serono Symposia, 1995
20. Tarnuzzer RW, Schultz GS: Biochemical analysis of acute and chronic wound environments. *Wound Repair Regen* 4:321–325, 1996
21. Lazarus GS, Cooper DM, Knighton DR, Margolis DJ, Pecoraro RE, Rodeheaver G, Robson MC: Definitions and guidelines for assessment of wounds and evaluation of healing. *Arch Dermatol* 130:489–493, 1994
22. Singer AJ, Clark RA: Cutaneous wound healing. *N Engl J Med* 341:738–746, 1999
23. Gillitzer R, Goebeler M: Chemokines in cutaneous wound healing. *J Leukoc Biol* 69:513–521, 2001
24. Ravanti L, Kahari VM: Matrix metalloproteinases in wound repair (Review). *Int J Mol Med* 6:391–407, 2000
25. Cohen IK, Mast BA: Models of wound healing. *J Trauma* 30 (Suppl. 12):S149–S155, 1990
26. Chen C, Schultz GS, Bloch M, Edwards PD, Tebes S, Mast BA: Molecular and mechanistic validation of delayed healing rat wounds as a model for human chronic wounds. *Wound Repair Regen* 7:486–494, 1999
27. Yager DR, Zhang Y, Liang H-X, Diegelmann RF, Cohen IK: Wound fluids from human pressure ulcers contain elevated matrix metalloproteinase levels and activity compared to surgical wound fluids. *J Invest Dermatol* 107:743–748, 1996
28. Piaggese A, Viacava P, Rizzo L, Naccarato G, Baccetti F, Romanelli M, Zampa V, Del Prato S: Semiquantitative analysis of the histopathological features of the neuropathic foot ulcer: effects of pressure relief. *Diabetes Care* 26:3123–3128, 2003
29. Lynch SE, Colvin RB, Antoniadis HN: Growth factors in wound healing: single and synergistic effects on partial thickness porcine skin wounds. *J Clin Invest* 84:640–646, 1989
30. Katz MH, Alvarez AF, Kirsner RS, Eaglstein WH, Falanga V: Human wound fluid from acute wounds stimulates fibroblast and endothelial cell growth. *J Am Acad Dermatol* 25:1054–1058, 1991
31. Davidson JM, Broadley KN, Quaglini D Jr: Reversal of the wound healing deficit in diabetic rats by recombined basic fibroblast growth factor and transforming growth factor- $\beta$ 1 therapy. *Wound Repair Regen* 5:77–88, 1997
32. Puolakkainen PA, Twardzik DR, Ranchalis JE, Pankey SC, Reed MJ, Gombotz WR: The enhancement in wound healing by transforming growth factor-beta 1 (TGF-beta 1) depends on the topical delivery system. *J Surg Res* 58:321–329, 1995
33. Loot MA, Kenter SB, Au FL, van Galen WJ, Middelkoop E, Bos JD, Mekkes JR: Fibroblasts derived from chronic diabetic ulcers differ in their response to stimulation with EGF, IGF-I, bFGF and PDGF-AB compared to controls. *Eur J Cell Biol* 81:153–160, 2002
34. Cooper DM, Yu EZ, Hennessey PJ, Ko F, Robson MC: Determination of endogenous cytokines in chronic wounds. *Ann Surg* 219:688–692, 1994
35. Falanga V: Growth factors and chronic wounds: the need to understand the microenvironment. *J Dermatol* 19:667–672, 1992
36. Bennett NT, Schultz GS: Growth factors and wound healing: Part II. Role in normal and chronic wound healing. *Am J Surg* 166:74–81, 1993
37. Alheim K, Bartfai T: The interleukin-1 system: receptors, ligands, and ICE in the brain and their involvement in the fever response. *Ann NY Acad Sci* 840:51–58, 1998
38. Graves DT, Nooh N, Gillen T, Davey M, Patel S, Cottrell D, Amar S: IL-1 plays a critical role in oral, but not dermal, wound healing. *J Immunol* 167:5316–5320, 2001
39. Sauder DN, Kilian PL, McLane JA, Quick TW, Jakubovic H, Davis SC, Eaglstein WH, Mertz PM: Interleukin-1 enhances epidermal wound healing. *Lymphokine Res* 9:465–473, 1990
40. Trengove NJ, Bielefeldt-Ohmann H, Stacey MC: Mitogenic activity and cytokine levels in non-healing and healing chronic leg ulcers. *Wound Repair Regen* 8:13–25, 2000
41. Barbul A, Knud-Hansen J, Wasserkrug HL, Efron G: Interleukin 2 enhances wound healing in rats. *J Surg Res* 40:315–319, 1986
42. Barbul A: Role of T-cell-dependent immune system in wound healing. *Prog Clin Biol Res* 266:161–175, 1988
43. Mustoe TA, Pierce GF, Thomason A, Gramates P, Sporn MB, Deuel TF: Accelerated healing of incisional wounds in rats induced by transforming growth factor-beta. *Science* 237:1333–1336, 1987
44. Broadley KN, Aquino AM, Hicks B, Ditesheim JA, McGee GS, Demetriou AA, Woodward SC, Davidson JM: The diabetic rat as an impaired wound healing model: stimulatory effects of transforming growth factor-beta and basic fibroblast growth factor. *Biotechnol Ther* 1:55–68, 1989
45. Deuel TF, Kawahara RS, Mustoe TA, Pierce AF: Growth factors and wound healing: platelet-derived growth factor as a model cytokine. *Annu Rev Med* 42:567–584, 1991
46. Ross R: Platelet-derived growth factor. *Lancet* 1179–1182, 1989
47. Beer HD, Longaker MT, Werner S: Reduced expression of PDGF and PDGF receptors during impaired wound healing. *J Invest Dermatol* 109:132–138, 1997
48. Kahari V-M, Saarialho-Kere UK: Matrix metalloproteinases in skin. *Exp Dermatol* 6:199–213, 1997
49. Parsons SL, Watson SA, Brown PD, Collins HM, Steele JC: Matrix metalloproteinase. *Br J Surg* 84:160–166, 1997
50. Wang JF, Olson ME, Reno CR, Kulyk W, Wright JB, Hart DA: Molecular and cell biology of skin wound healing in a pig model. *Connect Tissue Res* 41:195–211, 2000
51. Mun-Bryce S, Rosenberg GA: Gelatinase B modulates selective opening of the blood-brain barrier during inflammation. *Am J Physiol* 274:R1203–R1211, 1998
52. Zhang H, Li C, Baciuc PC: Expression of integrins and MMPs during alkaline-burn-induced corneal angiogenesis. *Invest Ophthalmol Vis Sci* 43:955–962, 2002
53. Armstrong DG, Jude EB: The role of matrix metalloproteinases in wound healing. *J Am Podiatr Med Assoc* 92:12–18, 2002
54. Woessner JF Jr: The family of matrix metalloproteinases. *Ann N Y Acad Sci* 732:11–21, 1994
55. Stricklin GP, Li L, Jancic V, Wenczak BA, Nanney LB: Localization of mRNAs representing collagenase and TIMP in sections of healing human burn wounds. *Am J Pathol* 143:1657–1666, 1993
56. Ladwig GP, Robson MC, Liu R, Kuhn MA, Muir DF, Schultz GS: Ratios of activated matrix metalloproteinase-9 to

- tissue inhibitor of matrix metalloproteinase-1 in wound fluids are inversely correlated with healing of pressure ulcers. *Wound Repair Regen* 10:26–37, 2002
57. Nwomeh BC, Liang H-X, Cohen IK, Yager DR: MMP-8 is the predominant collagenase in healing wounds and non-healing ulcers. *J Surg Res* 81:189–195, 2001
  58. Saarialho-Kere UK, Pentland AP, Birkedal-Hansen H, Parks WC, Welgus HG: Distinct populations of basal keratinocytes express stromelysin-1 and stromelysin-2 in chronic wounds. *J Clin Invest* 94:79–88, 1994
  59. Porras-Reyes BH, Blair HC, Jeffrey JJ, Mustoe TA: Collagenase production at the border of granulation tissue in a healing wound: macrophage and mesenchymal collagenase production in vivo. *Connect Tissue Res* 27:63–71, 1991
  60. Mauviel A: Cytokine regulation of metalloproteinase gene expression. *J Cell Biochem* 53:288–295, 1993
  61. Han YP, Tuan TL, Wu H, Hughes M, Garner WL: TNF- $\alpha$  stimulates activation of pro-MMP2 in human skin through NF-( $\kappa$ )B mediated induction of MT1-MMP. *J Cell Sci* 114:131–139, 2001
  62. Zhang Y, McCluskey K, Fujii K, Wahl LM: Differential regulation of monocyte matrix metalloproteinase and TIMP-1 production by TNF- $\alpha$ , granulocyte-macrophage CSF, and IL-1b through prostaglandin-dependent and independent mechanism. *J Immunol* 307:1–3076, 1998
  63. McCawley LJ, O'Brien P, Hudson LG: Epidermal growth factor (EGF)- and scatter factor/hepatocyte growth factor (SF/HGF)- mediated keratinocyte migration is coincident with induction of matrix metalloproteinase (MMP)-9. *J Cell Physiol* 176:255–265, 1998
  64. Li DQ, Lokeshwar BL, Solomon A, Monroy D, Ji Z, Pflugfelder SC: Regulation of MMP-9 production by human corneal epithelial cells. *Exp Eye Res* 73:449–459, 2001
  65. Bond M, Baker AH, Newby AC: Nuclear factor kappaB activity is essential for matrix metalloproteinase-1 and -3 upregulation in rabbit dermal fibroblasts. *Biochem Biophys Res Commun* 264:561–567, 1999
  66. Mauviel A, Chung KY, Agarwal A, Tamai K, Uitto J: Cell-specific induction of distinct oncogenes of the Jun family is responsible for differential regulation of collagenase gene expression by transforming growth factor-beta in fibroblasts and keratinocytes. *J Biol Chem* 271:10917–10923, 1996
  67. Kim JH, Hong SH, Nah HY, Lee JY, Chae HD, Kim CH, Kang BM, Bae IH: Influence of transforming growth factor-alpha on expression of matrix metalloproteinase-2, matrix metalloproteinase-9, and epidermal growth factor receptor gene in the mouse blastocysts. *J Assist Reprod Genet* 19:232–239, 2002
  68. Han YP, Tuan TL, Hughes M, Wu H, Garner WL: Transforming growth factor-beta - and tumor necrosis factor-alpha -mediated induction and proteolytic activation of MMP-9 in human skin. *J Biol Chem* 276:22341–22350, 2001
  69. Johansson N, Westermarck J, Leppa S, Hakkinen L, Koivisto L, Lopez-Otin C, Peltonen J, Heino J, Kahari VM: Collagenase 3 (matrix metalloproteinase 13) gene expression by HaCaT keratinocytes is enhanced by tumor necrosis factor alpha and transforming growth factor beta. *Cell Growth Differ* 8:243–250, 1997
  70. Schroen DJ, Brinckerhoff CE: Nuclear hormone receptors inhibit matrix metalloproteinase (MMP) gene expression through diverse mechanisms. *Gene Expr* 6:197–207, 1996
  71. Van Wart HE, Birkedal-Hansen H: The cysteine switch: a principle of regulation of metalloproteinase activity with potential applicability to the entire matrix metalloproteinase gene family. *Proc Natl Acad Sci U S A* 87:5578–5582, 1990
  72. Kugler A: Matrix metalloproteinases and their inhibitors. *Anticancer Res* 19:1589–1592, 1999
  73. Arumugam S, Jang YC, Chen-Jensen C, Gibran NS, Isik FF: Temporal activity of plasminogen activators and matrix metalloproteinases during cutaneous wound repair. *Surgery* 125:587–593, 1999
  74. Birkedal-Hansen H: Proteolytic remodeling of extracellular matrix. *Curr Opin Cell Biol* 7:728–735, 1995
  75. Borregaard N, Kjeldsen L, Lollike K, Sengelov H: Granules and vesicles of human neutrophils: the role of endomembranes as source of plasma membrane proteins. *Eur J Haematol* 51:318–322, 1993
  76. AGren MS: Gelatinase activity during wound healing. *Br J Dermatol* 131:634–640, 1994
  77. Pilcher BK, Wang M, Qin XJ, Parks WC, Senior RM, Welgus HG: Role of matrix metalloproteinases and their inhibition in cutaneous wound healing and allergic contact hypersensitivity. *Ann N Y Acad Sci* 878:12–24, 1999
  78. Murphy GJ, Murphy G, Reynolds JJ: The origin of matrix metalloproteinases and their familial relationships. *FEBS Lett* 289:4–7, 1991
  79. McDonnell S, Matrisian LM: Stromelysin in tumor progression and metastasis. *Cancer Metastasis Rev* 9:305–319, 1990
  80. Young PJ, Grinnell F: Metalloproteinase activation cascade after burn injury: a longitudinal analysis of the human wound environment. *J Invest Dermatol* 103:660–664, 1994
  81. Seiki M: Membrane-type matrix metalloproteinases. *APMIS* 107:137–143, 1999
  82. Ueno H, Nakamura H, Inoue M, Imai K, Noguchi M, Sato H, Seiki M, Okada Y: Expression and tissue localization of membrane-types 1, 2, and 3 matrix metalloproteinases in human invasive breast carcinomas. *Cancer Res* 57:2055–2060, 1997
  83. Pei D, Weiss SJ: Transmembrane-deletion mutants of the membrane-type matrix metalloproteinase-1 process progelatinase A and express intrinsic matrix-degrading activity. *J Biol Chem* 271:9135–9140, 1996
  84. Goldberg GI, Marmer BL, Grant GA, Eisen AZ, Wilhelm S, He CS: Human 72-kilodalton type IV collagenase forms a complex with a tissue inhibitor of metalloproteinases designated TIMP-2. *Proc Natl Acad Sci U S A* 86:8207–8211, 1989
  85. Brew K, Dinakarpandian D, Nagase H: Tissue inhibitors of metalloproteinases: evolution, structure and function. *Biochim Biophys Acta* 1477:267–283, 2000
  86. DeClerck YA, Yean TD, Lee Y, Tomich JM, Langley KE: Characterization of the functional domain of tissue inhibitor of metalloproteinases-2 (TIMP-2). *Biochem J* 289 (Pt. 1):65–69, 1993
  87. Madlener M, Parks WC, Werner S: Matrix metalloproteinases (MMPs) and their physiological inhibitors (TIMPs) are differentially expressed during excisional skin wound repair. *Exp Cell Res* 242:201–210, 1998
  88. Saarialho-Kere UK: Patterns of matrix metalloproteinase and TIMP expression in chronic ulcers. *Arch Dermatol Res* 290 (Suppl.):S47–S54, 1998
  89. Vaalamo M, Weckroth M, Puolakkainen P, Kere J, Saarinen P, Lauharanta J, Saarialho-Kere UK: Patterns of matrix metalloproteinase and TIMP-1 expression in chronic and normally healing human cutaneous wounds. *Br J Dermatol* 135: 52–59, 1996
  90. Bullen EC, Longaker MT, Updike DL, Benton R, Ladin D, Hou Z, Howard EW: Tissue inhibitor of metalloproteinases-1 is decreased and activated gelatinases are increased in chronic wounds. *J Invest Dermatol* 104:236–240, 1995
  91. Wysocki AB, Staiano-Coico L, Grinnell F: Wound fluid from chronic leg ulcers contains elevated levels of metalloproteinases MMP-2 and MMP-9. *J Invest Dermatol* 101:64–68, 1993
  92. Vaalamo M, Mattila L, Johansson N, Kariniemi A-L, Karjalainen-Lindsberg M-L, Kahari V-M, Saarialho-Kere U: Distinct populations of stromal cells express collagenase-3 (MMP-13) and Collage-

- nase-1 (MMP-1) in chronic ulcers but not in normally healing wounds. *J Invest Dermatol* 109:96–101, 1997
93. Vaalamo M, Leivo T, Saarialho-Kere U: Differential expression of tissue inhibitors of metalloproteinases (TIMP-1, -2, -3, and -4) in normal and aberrant wound healing. *Hum Pathol* 30:795–802, 1999
94. Loots MA, Lamme EN, Zeegelaar J, Mekkes JR, Bos JD, Middelkoop E: Differences in cellular infiltrate and extracellular matrix of chronic diabetic and venous ulcers versus acute wounds. *J Invest Dermatol* 111:850–857, 1998
95. Dahn MS: The role of growth factors in wound management of diabetic foot ulcers. *Federal Practitioner* 7:14–19, 1998
96. Mansbridge JN, Liu K, Pinney RE, Patch R, Ratcliffe A, Naughton GK: Growth factors secreted by fibroblasts: role in healing diabetic foot ulcers. *Diabetes Obes Metab* 1:265–279, 1999
97. Lobmann R, Ambrosch A, Schultz G, Waldmann K, Schiweck S, Lehnert H: Expression of matrix-metalloproteinases and their inhibitors in the wounds of diabetic and non-diabetic patients. *Diabetologia* 45:1011–1016, 2002
98. Cullen B, Smith R, McCulloch E, Silcock D, Morrison L: Mechanism of action of PROMOGRAN, a protease modulating matrix, for the treatment of diabetic foot ulcers. *Wound Repair Regen* 10:16–25, 2002
99. Veves A, Sheehan P, Pham HT: A randomized, controlled trial of Promogran (a collagen/oxidized regenerated cellulose dressing) vs standard treatment in the management of diabetic foot ulcers. *Arch Surg* 137:822–827, 2002
100. Vin F, Teot L, Meaume S: The healing properties of promogran in venous leg ulcers. *J Wound Care* 11:335–341, 2002
101. Lamparter S, Slight SH, Weber KT: Doxycycline and tissue repair in rats. *J Lab Clin Med* 139:295–302, 2002
102. Laihio A, Konttinen YT, Tschesche H, Nordstrom D, Salo T, Lahdevirta J, Golub LM, Sorsa T: Reduction of matrix metalloproteinase 8-neutrophil collagenase levels during long-term doxycycline treatment of reactive arthritis. *Antimicrob Agents Chemother* 38:400–402, 1994
103. Knighton DR, Ciresi K, Fiegel VD, Austin LL, Butler E: Classification and treatment of chronic, non-healing wounds: successful treatment with autologous platelet-derived wound healing factors (PDWHF). *Ann Surg* 204:322–330, 1986
104. Greenhalgh DG, Sprugel KH, Murray MJ, Ross R: PDGF and FGF stimulate wound healing in the genetically diabetic mouse. *Am J Pathol* 136:1235–1246, 1990
105. Holloway GA, Steed DL, DeMarco MJ, Masumoto T, Moosa HH, Webster MW, Bunt TJ, Polansky M: A randomized, controlled, multicenter, dose response trial of activated platelet supernatant, topical CT-102 in chronic, non-healing, diabetic wounds. *Wounds* 5:198–206, 1993
106. Ladin D: Becaplermin gel (PDGF-BB) as topical wound therapy: Plastic Surgery Educational Foundation DATA Committee. *Plast Reconstr Surg* 105:1230–1231, 2000
107. Mandracchia VJ, Sanders SM, Frerichs JA: The use of becaplermin (rhPDGF-BB) gel for chronic nonhealing ulcers: a retrospective analysis. *Clin Podiatr Med Surg* 18:189–209, 2001
108. Pierce GF, Tarpley JE, Tseng J, Bready J, Chang D, Kennedy WC, Ross R, Robson MC, Berg JV, Reid P, Kaufman S, Farrell CL: Detection of platelet-derived growth factor (PDGF) -AA in actively healing human wounds treated with recombinant PDGF in chronic nonhealing wounds. *J Clin Invest* 96:1336–1350, 1995
109. Robson MC, Phillips LG, Thomason A, Robson LE, Pierce GF: Platelet-derived growth factor BB for the treatment of chronic ulcers. *Lancet* 339:23–25, 1992
110. Smiell JM: Clinical safety of becaplermin (rhPDGF-BB) gel: Becaplermin Studies Group. *Am J Surg* 176: (Suppl. 2A):68S–73S, 1998
111. Wieman TJ: Clinical efficacy of becaplermin (rhPDGF-BB) gel: Becaplermin Gel Studies Group. *Am J Surg* 176: (Suppl. 2A):74S–79S, 1998
112. Smiell J, Wieman TJ, Steed DL, Perry BH, Sampson AR, Schwab BH: Efficacy and safety of becaplermin (recombinant human platelet-derived growth factor-BB) in patients with non-healing, lower extremity diabetic ulcers: a combined analysis of four randomized studies. *Wound Repair Regen* 7:335–346, 1999
113. Steed DL, Donohoe D, Webster MW, Lindsley L: Effect of extensive debridement and treatment on the healing of diabetic foot ulcers: Diabetic Ulcer Study Group. *J Am Coll Surg* 183:61–64, 1996
114. Schultz GS, Sibbald RG, Falanga V, Ayello EA, Dowsett C, Harding K, Romanelli M, Stacey MC, Teot L, Vanscheidt W: Wound bed preparation: a systematic approach to wound management. *Wound Repair Regen* 1 (Suppl. 11): S1–S28, 2003
115. Lee HM, Golub LM, Chan D, Leung M, Schroeder K, Wolff M, Simon S, Crout R: Alpha 1-Proteinase inhibitor in gingival crevicular fluid of humans with adult periodontitis: serpinolytic inhibition by doxycycline. *J Periodontol Res* 32:9–19, 1997
116. Pirila E, Parikka M, Ramamurthy NS, Maisi P, McClain S, Kucine A, Tervahartiala T, Prikk K, Golub LM, Salo T, Sorsa T: Chemically modified tetracycline (CMT-8) and estrogen promote wound healing in ovariectomized rats: effects on matrix metalloproteinase-2, membrane type 1 matrix metalloproteinase, and laminin-5 gamma2-chain. *Wound Repair Regen* 10:38–51, 2002
117. Chin GA, Thigpin TG, Perrin KJ, Moldawer LL, Schultz GS: Treatment of chronic ulcers in diabetic patients with a topical metalloproteinase inhibitor, doxycycline. *Wounds* 15:315–323, 2003
118. Ghatnekar O, Willis M, Persson U: Cost-effectiveness of treating deep diabetic foot ulcers with Promogran in four European countries. *J Wound Care* 11:70–74, 2002
119. van den Berg AJ, Halkes SB, van Ufford HC, Hoekstra MJ, Beukelman CJ: A novel formulation of metal ions and citric acid reduces reactive oxygen species in vitro. *J Wound Care* 12:413–418, 2003
120. Williams RL, Armstrong DG: Wound healing: new modalities for a new millennium. *Clin Podiatr Med Surg* 15:117–128, 1998
121. Abbott CA, Vileikyte L, Williamson S, Carrington AL, Boulton AJ: Multicenter study of the incidence of and predictive risk factors for diabetic neuropathic foot ulceration. *Diabetes Care* 21:1071–1075, 1998
122. Ahroni JH: Preventing diabetic foot complications. *Adv Skin Wound Care* 13: 38–39, 2000
123. Ahroni JH: Tool chest: teaching foot care creatively and successfully. *Diabetes Educ* 19:320–324, 1993
124. Culleton JL: Preventing diabetic foot complications: tight glucose control and patient education are the keys. *Postgrad Med* 106:74–78, 83, 1999
125. McConnell EA: Teaching a patient with diabetes how to protect her feet. *Nursing* 28:32, 1998
126. Meijer JW, Links TP, Smit AJ, Groothoff JW, Eisma WH: Evaluation of a screening and prevention programme for diabetic foot complications. *Prosthet Orthot Int* 25:132–138, 2001
127. Peter-Riesch B, Assal J-P: Teaching diabetic foot care effectively. *J Am Podiatr Med Asso* 87:318–320, 1997
128. Apelqvist J, Larsson J: What is the most effective way to reduce incidence of amputation in the diabetic foot? *Diabetes Metab Res Rev* 16 (Suppl. 1):S75–S83, 2000
129. Levin ME: Prevention and treatment of diabetic foot wounds. *J Wound Ostomy Continence Nurs* 25:129–146, 1998
130. Oyibo SO, Jude EB, Tarawneh I, Nguyen HC, Harkless LB, Boulton AJ: A compar-

- ison of two diabetic foot ulcer classification systems: the Wagner and the University of Texas wound classification systems. *Diabetes Care* 24:84–88, 2001
131. Steed DL: Foundation of good ulcer care. *Am J Surg* 176 (Suppl. 2A):20S–25S, 1998
  132. Knighton DR, Ciresi K, Fiegel VD, Schummerth S, Butler E, Cerra F: Stimulation of repair in chronic nonhealing cutaneous ulcers using platelet-derived wound healing formula. *Surg Gynecol Obstet* 170:56–60, 1990
  133. Knighton DR, Fiegel VD: Growth factors and comprehensive surgical care of diabetic wounds. *Curr Opin Gen Surg* 32–39, 1993
  134. Robson MC, Mustoe TA, Hunt TK: The future of recombinant growth factors in wound healing. *Am J Surg* 176 (Suppl. 2A):80S–82S, 1998
  135. Steed DL: Clinical evaluation of recombinant human platelet-derived growth factor for the treatment of lower extremity diabetic ulcers: Diabetic Ulcer Study Group. *J Vasc Surg* 21:71–78, 1995
  136. Smith GN Jr, Mickler EA, Hasty KA, Brandt KD: Specificity of inhibition of matrix metalloproteinase activity by doxycycline: relationship to structure of the enzyme. *Arthritis Rheum* 42:1140–1146, 1999
  137. Brantigan CO: The history of understanding the role of growth factors in wound healing. *Wounds* 8:78–90, 1996
  138. Woessner JF Jr: Matrix metalloproteinase inhibition: from the Jurassic to the third millennium. *Ann N Y Acad Sci* 878:388–403, 1999
